# Supplementary material for: Ultrasensitive electrochemiluminescence aptasensor based on a graphene/polyaniline composite film modified electrode and CdS quantum dot coated platinum nanostructured networks as labels
Source: Royal Society of Chemistry journal article supplement (doi:10.1039/c5ra12674f), 2015-01-01
Supplement: c5ra12674f1.pdf [file c5ra12674f1.pdf]

Ultrasensitive electrochemiluminescence aptasensor based on graphene/polyaniline composite films modified electrode and CdS quantum dots coated platinum nanostructured networks as labels

Qingkun Kong<sup>a</sup>, Meng Li<sup>a</sup>, Chao Ma<sup>a</sup>, Hongmei Yang<sup>a</sup>, Shenguang Ge<sup>b</sup>, Mei Yan<sup>a</sup>, Jinghua Yu<sup>a</sup>. \*

<sup>a</sup> School of Chemistry and Chemical Engineering, University of Jinan, Jinan 250022, P. R. China.

<sup>b</sup> Shandong Provincial Key Laboratory of Preparation and Measurement of Building Materials, University of Jinan, Jinan 250022, P. R. China.

\*Corresponding author: Jinghua Yu

E-mail: [ujn.yujh@gmail.com](mailto:ujn.yujh@gmail.com)

Telephone: +86-531-82767161

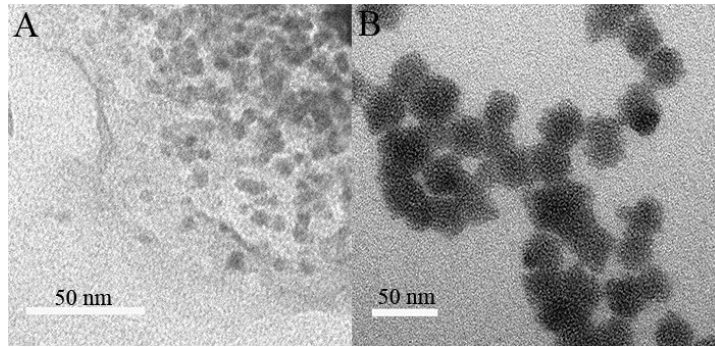

Figure S1. TEM of CdS QDs (A) and PNNs/CdS QDs (B).
